# Supplementary material for: Dual-channel synthesis of H2O2via photoelectrocatalytic water oxidation and oxygen reduction over a TaON/Ta3N5/CuI/Cu foam electrode
Source: Royal Society of Chemistry journal article supplement (doi:10.1039/d3cy01762a), 2024-01-01
Supplement: d3cy01762a1.pdf [file d3cy01762a1.pdf]

## Dual-channel synthesis of H<sub>2</sub>O<sub>2</sub> via photoelectrocatalytic water oxidation and oxygen reduction over TaON/Ta<sub>3</sub>N<sub>5</sub>/CuI/Cu foam electrode

Shaomang Wang<sup>a,b</sup>, Jie Wang<sup>a</sup>, Haokang Wu<sup>a</sup>, Yuan Guan<sup>c</sup>, Zhongyu Li<sup>a,\*</sup>, Shicheng Yan<sup>d,\*</sup>,  
Zhigang Zou<sup>d</sup>

<sup>a</sup> School of Environmental Science and Engineering, Changzhou University, Changzhou 213164, P. R. China.

<sup>b</sup> School of Urban Construction, Changzhou University, Changzhou 213164, P. R. China.

<sup>c</sup> Jiangsu Key Laboratory of Advanced Catalytic Materials and Technology, School of Petrochemical Engineering, Changzhou University, Changzhou 213164, P. R. China.

<sup>d</sup> Eco-Materials and Renewable Energy Research Center (ERERC), College of Engineering and Applied Sciences, Nanjing University, Nanjing 210093, P. R. China.

\*E-mail: zhongyuli@cczu.edu.cn, yscfei@nju.edu.cn

**Table S1** Comparison of the activity of different catalysts for the synthesis of H<sub>2</sub>O<sub>2</sub> by different methods

| Catalyst                                    | Synthesis method | Reaction pathway                            | H <sub>2</sub> O <sub>2</sub> production rate              | reference |
|---------------------------------------------|------------------|---------------------------------------------|------------------------------------------------------------|-----------|
| ZIF-8/C <sub>3</sub> N <sub>4</sub>         | PC               | 2e <sup>-</sup> ORR and WOR                 | 2641.0 μmol g <sup>-1</sup> h <sup>-1</sup>                | 1         |
| Ni-CAT-CN <sub>60</sub>                     | PC               | 1e <sup>-</sup> ORR and 4e <sup>-</sup> WOR | 1801.0 μmol g <sup>-1</sup> h <sup>-1</sup>                | 2         |
| C, N co-doped TiO <sub>2</sub>              | EC               | 2e <sup>-</sup> WOR                         | 0.3 μmol L <sup>-1</sup> cm <sup>-2</sup> h <sup>-1</sup>  | 3         |
| α-Fe <sub>2</sub> O <sub>3</sub> -GDE       | PEC              | 2e <sup>-</sup> ORR                         | 58.8 μmol L <sup>-1</sup> cm <sup>-2</sup> h <sup>-1</sup> | 4         |
| (1T-2H)-MoSe <sub>2</sub> /TiO <sub>2</sub> | PEC              | 1e <sup>-</sup> ORR                         | 38.0 μmol cm <sup>-2</sup> h <sup>-1</sup>                 | 5         |
| SnO <sub>2-x</sub> -BiVO <sub>4</sub>       | PEC              | 2e <sup>-</sup> and 4e <sup>-</sup> WOR     | 48.0 μmol cm <sup>-2</sup> h <sup>-1</sup>                 | 6         |
| Mo-doped BiVO <sub>4</sub>                  | PEC              | 2e <sup>-</sup> ORR and 4e <sup>-</sup> WOR | 9.6 μmol cm <sup>-2</sup> h <sup>-1</sup>                  | 7         |
| NiFeO <sub>x</sub> /BiVO <sub>4</sub> -pTTh | PEC              | 2e <sup>-</sup> ORR                         | 1.1 mmol L <sup>-1</sup> cm <sup>-2</sup> h <sup>-1</sup>  | 8         |
| CuWO <sub>4</sub>                           | PEC              | 2e <sup>-</sup> ORR and WOR                 | 0.7 mmol cm <sup>-2</sup> h <sup>-1</sup>                  | 9         |
| WO <sub>3</sub> /FPC                        | PEC              | 2e <sup>-</sup> ORR                         | 0.2 mmol L <sup>-1</sup> cm <sup>-2</sup> h <sup>-1</sup>  | 10        |

**Table S2** The fitting parameters of the R(C(RW)) equivalent circuit model

| Photoanodes | Rs                        | CPE-T                                                         | CPE-P                                                         | R <sub>p</sub>            |
|-------------|---------------------------|---------------------------------------------------------------|---------------------------------------------------------------|---------------------------|
|             | ( $\Omega \text{ cm}^2$ ) | ( $\Omega^{-1} \text{S}^n \text{ cm}^{-2}$ )<br>$\times 10^3$ | ( $\Omega^{-1} \text{S}^n \text{ cm}^{-2}$ )<br>$\times 10^3$ | ( $\Omega \text{ cm}^2$ ) |
| CuI/Cu      | 3.412                     | 5.5718                                                        | 468.41                                                        | 39.792                    |
| TN/Cu       | 4.019                     | 2.2699                                                        | 539.27                                                        | 37.817                    |
| CIT-1       | 3.6955                    | 0.1342                                                        | 41.517                                                        | 16.892                    |
| CIT-2       | 4.940                     | 2.383                                                         | 494.01                                                        | 70.398                    |
| CIT-3       | 3.397                     | 13.899                                                        | 409.91                                                        | 22.542                    |

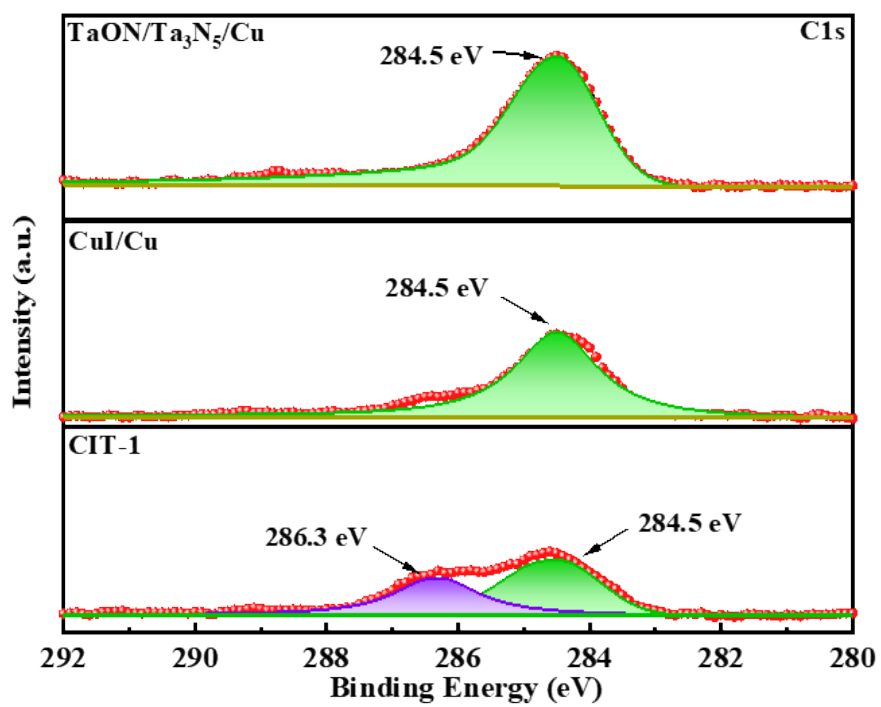

**Fig. S1** C 1s high resolution XPS spectra of TaON/Ta<sub>3</sub>N<sub>5</sub>/Cu, CuI/Cu, and CIT-1.

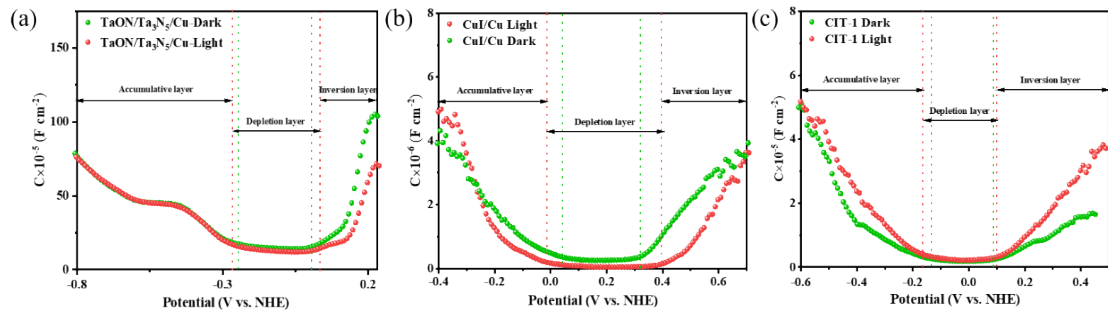

**Fig. S2** The C-E curves of (a) TaON/Ta<sub>3</sub>N<sub>5</sub>/Cu, (b) CuI/Cu, and (c) CIT-1 under dark and light.

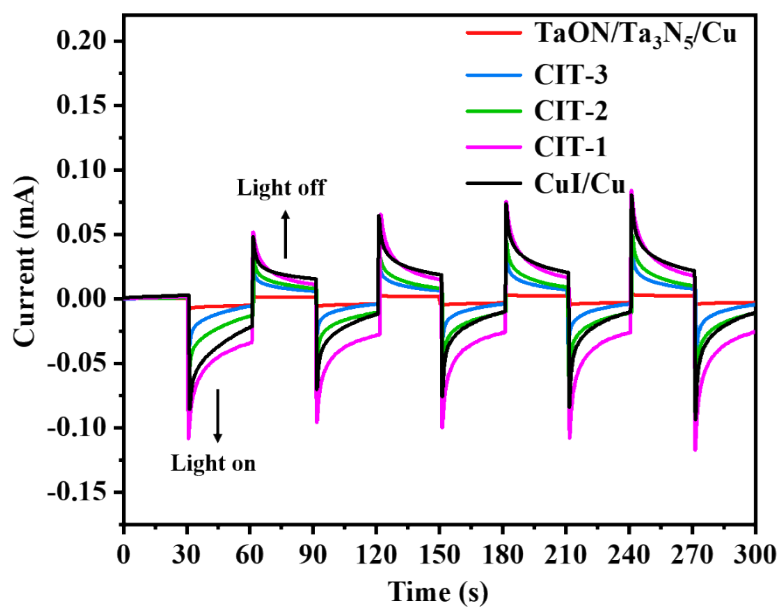

**Fig. S3** The J-t curves of TaON/Ta<sub>3</sub>N<sub>5</sub>/Cu, CuI/Cu, CIT-1, CIT-2 and CIT-3.

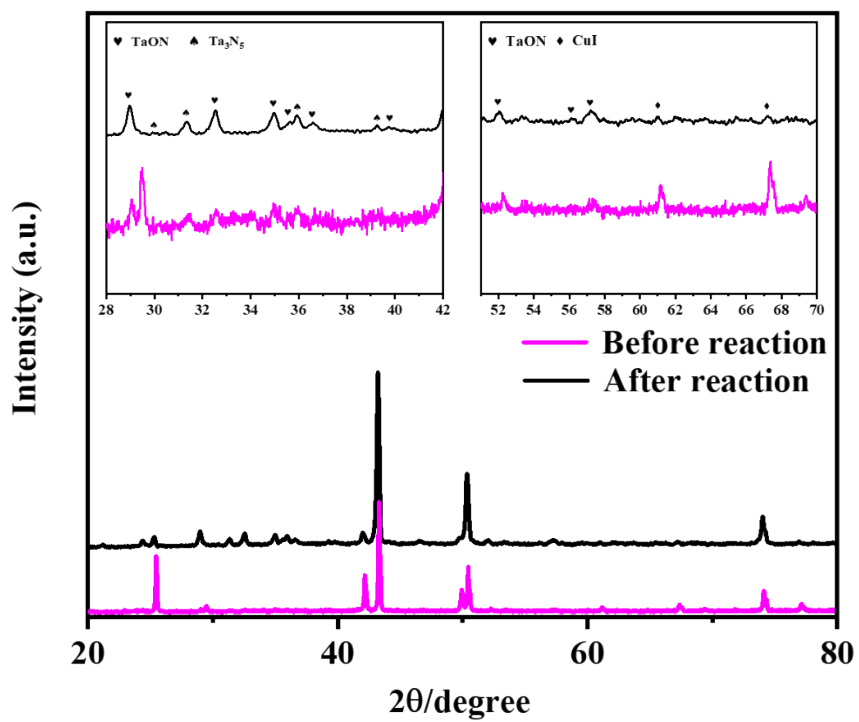

Fig. S4 The XRD patterns of CIT-1 before and after reaction.

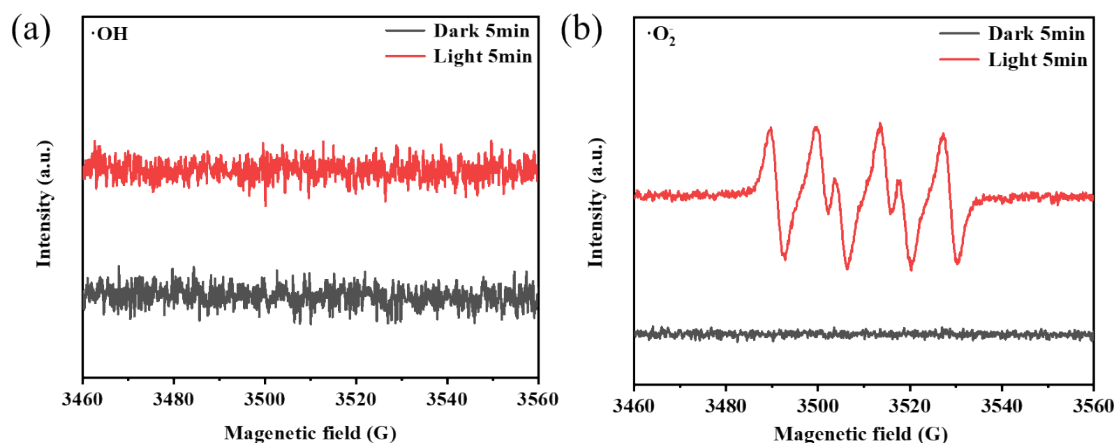

**Fig. S5** EPR spectra of CIT-1 for (a)  $\cdot\text{OH}$  and (b)  $\cdot\text{O}_2^-$  under dark and light.



## References

- 1 Y. Zhao, Y. Liu, J. Cao, H. Wang, M. Shao, H. Huang, Y. Liu and Z. Kang, *Appl. Catal. B.*, 2020, **278**, 119289.
- 2 Y. Zhao, Y. Liu, Z. Wang, Y. Ma, Y. Zhou, X. Shi, Q. Wu, X. Wang, M. Shao, H. Huang, Y. Liu and Z. Kang, *Appl. Catal. B.*, 2021, **289**, 120522.
- 3 S.g. Xue, L. Tang, Y.k. Tang, C.x. Li, M.l. Li, J.j. Zhou, W. Chen, F. Zhu and J. Jiang, *ACS Appl. Mater. Interfaces.*, 2019, **12**, 4423-4431.
- 4 X. Mei, J. Bai, S. Chen, M. Zhou, P. Jiang, C. Zhou, F. Fang, Y. Zhang, J. Li, M. Long and B. Zhou, *Environ. Sci. Technol.*, 2020, **54**, 11515-11525.
- 5 X. Zhang, Y. Zeng, W. Shi, Z. Tao, J. Liao, C. Ai, H. Si, Z. Wang, A.C. Fisher and S. Lin, *Chem. Eng. J.*, 2022, **429**, 131312.
- 6 K. Zhang, J. Liu, L. Wang, B. Jin, X. Yang, S. Zhang and J.H. Park, *J. Am. Chem. Soc.*, 2020, **142**, 8641-8648.
- 7 T.H. Jeon, H. Kim, H.i. Kim and W. Choi, *Energy Environ. Sci.*, 2020, **13**, 1730-1742.
- 8 W. Fan, B. Zhang, X. Wang, W. Ma, D. Li, Z. Wang, M. Dupuis, J. Shi, S. Liao and C. Li, *Energy Environ. Sci.*, 2020, **13**, 238-245.
- 9 L. Li, K. Xiao, P.K. Wong, Z. Hu and J. C. Yu, *ACS Appl. Mater. Interfaces.*, 2022, **14**, 7878-7887.
- 10 F. Ye, T. Wang, X. Quan, H. Yu and S. Chen, *Chem. Eng. J.*, 2020, **389**, 123427.
